# Supplementary material
Source: PubMed Central journal article supplement (PMC6588438)
Supplement: NIHMS1025667-supplement-Supp_FigS1.pdf [file NIHMS1025667-supplement-Supp_FigS1.pdf]

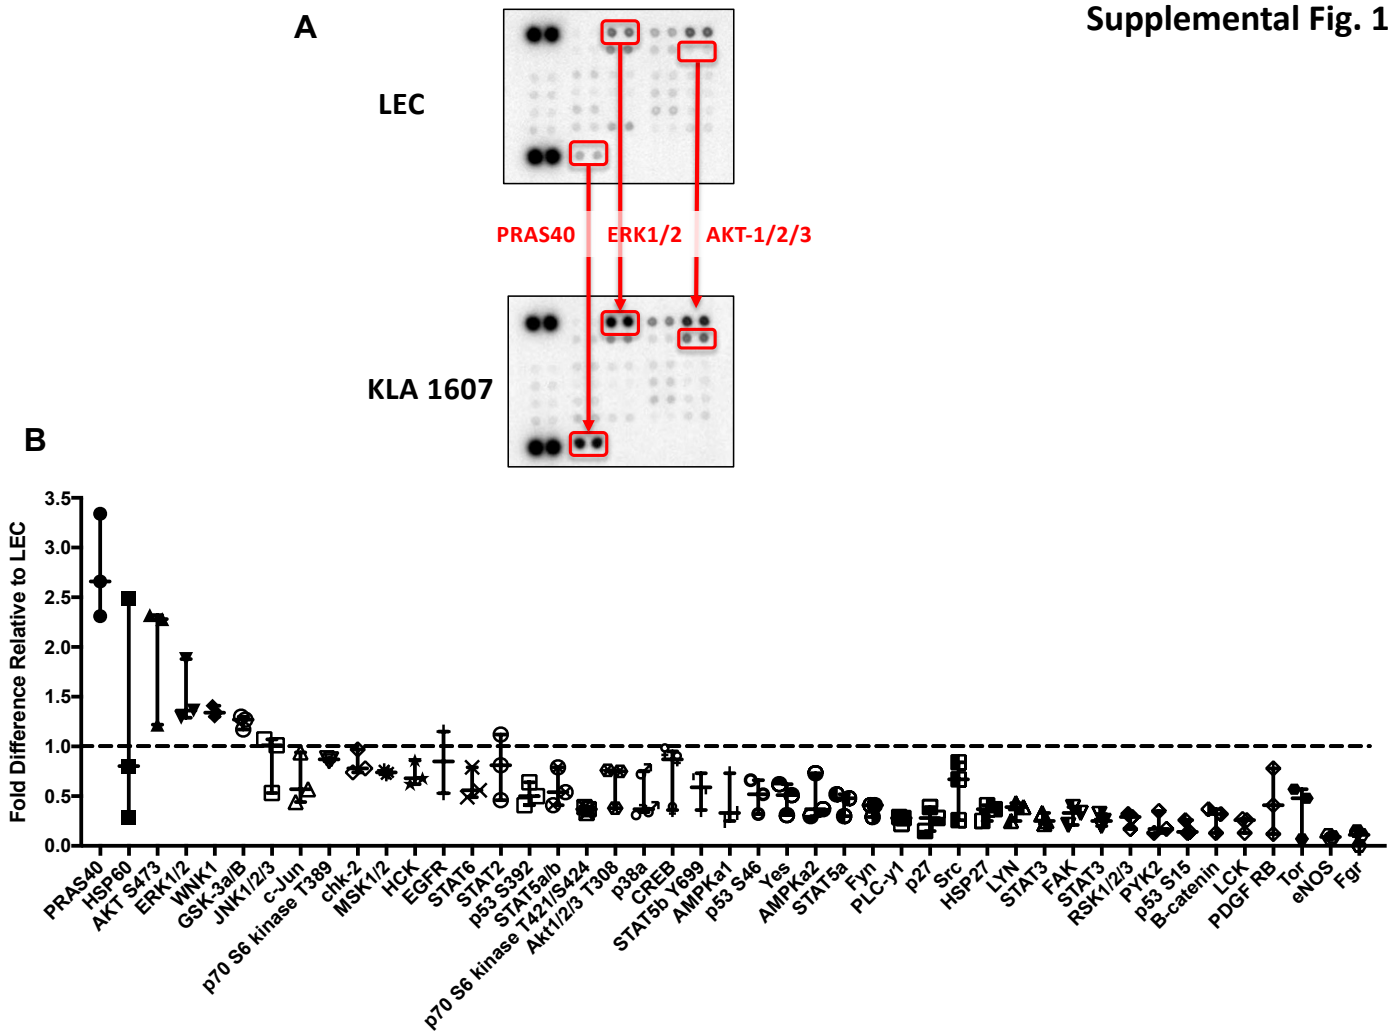

**A.** Kinase assay of cell lysates from normal neonatal lymphatic endothelial cells (LEC) and cells from KLA patients 1607. Some examples of protein phosphorylation differences are highlighted in red.

**B.** Histograms show results from kinase assay of cell lysates from KLA patients 1607, 1528, 2360 relative to levels in LEC.
